# Supplementary material
Source: HighWire-hosted journal article supplement (http://www.qdcxjkg.com/highwire/filestream/113872/field_highwire_adjunct_files/0/ERJ-00157-2012_Online_Supplement.pdf)
Supplement: ERJ-00157-2012_Online_Supplement.pdf [file ERJ-00157-2012_Online_Supplement.pdf]

# Online Data Supplement

## **The impact of preschool wheezing patterns on health-related quality of life at age 4 years**

Esther Hafkamp-de Groen, Ashna D. Mohangoo, Jeanne M. Landgraf, Johan C. de Jongste, Liesbeth Duijts, Henriëtte A. Moll, Vincent W.V. Jaddoe, Albert Hofman and Hein Raat

**Table S1. Non-response analyses (n=7295)**

| Characteristics                  | Population for analysis* |             | p Value†    |                                  |
|----------------------------------|--------------------------|-------------|-------------|----------------------------------|
|                                  |                          | (n=3878)    |             | Excluded population‡<br>(n=3417) |
| <i>Maternal characteristics</i>  |                          |             |             |                                  |
| Age at enrolment (years)         |                          | 31.7 (4.4)  | 29.2 (5.5)  | < 0.001                          |
| Educational level                | Low                      | 737 (14.9)  | 737 (39.8)  | < 0.001                          |
|                                  | Middle                   | 1367 (27.7) | 638 (34.5)  |                                  |
|                                  | High                     | 283 (57.4)  | 476 (25.7)  |                                  |
| Household income (€/month)       | < 1600                   | 598 (14.4)  | 177 (34.2)  | < 0.001                          |
|                                  | ≥ 1600                   | 3563 (85.6) | 341 (65.8)  |                                  |
| Ethnicity                        | Dutch                    | 3186 (64.9) | 601 (32.3)  | < 0.001                          |
|                                  | Other western            | 714 (14.6)  | 372 (20.2)  |                                  |
|                                  | Non-western              | 1007 (20.5) | 890 (47.8)  |                                  |
| Single motherhood                | Yes                      | 408 (8.5)   | 401 (22.0)  | < 0.001                          |
| Smoking during pregnancy         | Yes                      | 927 (22.7)  | 502 (29.2)  | < 0.001                          |
| Atopy                            | Yes                      | 1689 (39.2) | 635 (38.9)  | 0.857                            |
| Psychopathology                  | Highest tertile          | 1228 (32.3) | 457 (40.9)  | < 0.001                          |
|                                  | Middle tertile           | 1221 (32.1) | 324 (29.0)  |                                  |
|                                  | Lowest tertile           | 1354 (35.6) | 335 (30.0)  |                                  |
| <i>Child's characteristics</i>   |                          |             |             |                                  |
| Gender                           | Boy                      | 2516 (49.8) | 1165 (52.0) | 0.087                            |
| Gestational age (weeks)          |                          | 39.9 (1.8)  | 39.8 (1.8)  | 0.007                            |
| Birth weight (grams)             |                          | 3448 (566)  | 3362 (574)  | < 0.001                          |
| Respiratory tract infections     | Yes                      | 1755 (43.0) | 336 (43.3)  | 0.083                            |
| Postnatal tobacco smoke exposure | Yes                      | 854 (17.1)  | 76 (21.5)   | 0.033                            |
| Doctor-diagnosed asthma          | Yes                      | 168 (3.9)   | 38 (5.9)    | 0.021                            |
| Wheezing at the age of 1 year    | Yes                      | 1261 (30.3) | 240 (29.4)  | 0.611                            |
| Wheezing at the age of 2 years   | Yes                      | 1003 (20.1) | 86 (24.5)   | 0.049                            |
| Wheezing at the age of 3 years   | Yes                      | 533 (12.4)  | 111 (17.0)  | 0.001                            |
| Wheezing at the age of 4 years   | Yes                      | 530 (12.5)  | 115 (16.9)  | 0.001                            |

Values are absolute numbers (percentages) for categorical variables or means (standard deviation) for continuous variables. Data on wheezing pattern and at least one health related quality of life (HRQOL) scale is available. \*Exclusion due to missing information on wheezing pattern or on all HRQOL scales in cohort with full consent for postnatal follow-up. †UNIANOVA for continuous variables and Chi-square tests for categorical variables.

**Table S2. Adjusted associations between frequency of wheezing and HRQOL at age 4 years (n=3878)**

| <i>CHQ-PF28 Scale</i>       | <i>No wheezing<br/>N=3330 (86.8%)</i> | <i>1-3 episodes of wheezing<br/>N=417 (10.9%)</i> | <i>≥ 4 episodes of wheezing<br/>N=88 (2.3%)</i> |
|-----------------------------|---------------------------------------|---------------------------------------------------|-------------------------------------------------|
| Physical functioning        | Reference                             | <b>-1.8 (-2.9; -0.7)</b>                          | <b>-5.5 (-7.7; -3.3)</b>                        |
| Role functioning: emotional | Reference                             | -0.7 (-1.7; 0.3)                                  | <b>-3.9 (-5.9; -1.9)</b>                        |
| Role functioning: physical  | Reference                             | <b>-1.3 (-2.5; -0.1)</b>                          | <b>-6.4 (-8.8; -3.9)</b>                        |
| Bodily pain                 | Reference                             | <b>-3.4 (-5.2; -1.6)</b>                          | <b>-10.8 (-14.5; -7.1)</b>                      |
| General behaviour           | Reference                             | -0.1 (-1.6; 1.4)                                  | <b>-4.6 (-7.7; -1.5)</b>                        |
| Mental health               | Reference                             | -0.9 (-2.3; 0.5)                                  | -1.6 (-4.6; 1.3)                                |
| Self esteem                 | Reference                             | 0.9 (-0.7; 2.4)                                   | -2.5 (-5.6; 0.7)                                |
| General health perceptions  | Reference                             | <b>-7.2 (-8.6; -5.7)</b>                          | <b>-23.7 (-26.7; -20.7)</b>                     |
| Parental impact: emotional  | Reference                             | <b>-2.1 (-3.6; -0.6)</b>                          | <b>-11.6 (-14.7; -8.6)</b>                      |
| Parental impact: time       | Reference                             | <b>-1.7 (-3.1; -0.2)</b>                          | <b>-8.8 (-11.7; -5.9)</b>                       |
| Family activities           | Reference                             | -0.2 (-2.0; 1.5)                                  | <b>-8.9 (-12.5; -5.3)</b>                       |
| Family cohesion             | Reference                             | -1.6 (-3.5; 0.3)                                  | -1.1 (-5.0; 2.7)                                |
| Physical summary score      | Reference                             | <b>-2.3 (-3.0; -1.6)</b>                          | <b>-7.6 (-8.9; -6.3)</b>                        |
| Psychosocial summary score  | Reference                             | 0.0 (-0.7; 0.6)                                   | <b>-2.1 (-3.5; -0.8)</b>                        |
| Change in health            | Reference                             | <b>5.5 (3.6; 7.3)</b>                             | 2.6 (-1.2; 6.3)                                 |

Values are regression coefficients and 95% confidence intervals estimated by linear regression models. Frequency of wheezing symptoms (never; 1-3 times; ≥ 4 times) in the 4<sup>th</sup> year of life was assessed by a parent-reported question from the ISAAC (14). Data on frequency of wheezing is missing in 43 children. Each wheezing subgroup is compared to children without wheezing at the age of 4 years. The models are adjusted for covariates (including potential confounders): maternal age, maternal educational level and maternal ethnicity, household income, single motherhood, smoking during pregnancy, maternal atopy, maternal psychopathology, child's gender, gestational age and birth weight, child's exact age at measurement of HRQOL and child's exposure to tobacco smoking. Scales are analysed combined using the Physical Summary Score and Psychosocial Summary Score. Bold numbers indicate a significant difference in HRQOL score relative to the reference group. CHQ-PF28 = Child Health Questionnaire Parental Form. See table 1 in the manuscript for the definition of the scales.
